# Supplementary material for: Lipocalin2 Induced by Bacterial Flagellin Protects Mice against Cyclophosphamide Mediated Neutropenic Sepsis
Source: MDPI journal article supplement (doi:10.3390/microorganisms8050646), 2020-04-29
Supplement: s1 [file s1]

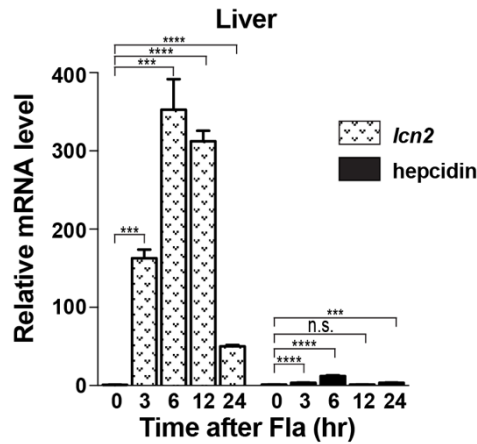

**Supplemental Figure 1. Hepcidin expression in the livers of mice treated with flagellin.** Mice were treated with flagellin (15  $\mu\text{g}/\text{mouse}$ ) through the intraperitoneal route on day 0. Hepcidin expression in the liver was measured by real-time PCR at the indicated time points ( $n = 4$  for each experiment) and normalized to GAPDH mRNA expression in the same samples. Numbers at each time point represent mRNA expression relative to that at  $t = 0$  in untreated samples. Data are expressed as the mean  $\pm$  SEM, and significance is indicated as \*\*\*  $P < 0.0005$  and \*\*\*\*  $P < 0.0001$ . To simplify the comparison, hepcidin expression levels at the indicated times are displayed together with *Lcn2* levels in the same liver samples from Figure 2B.

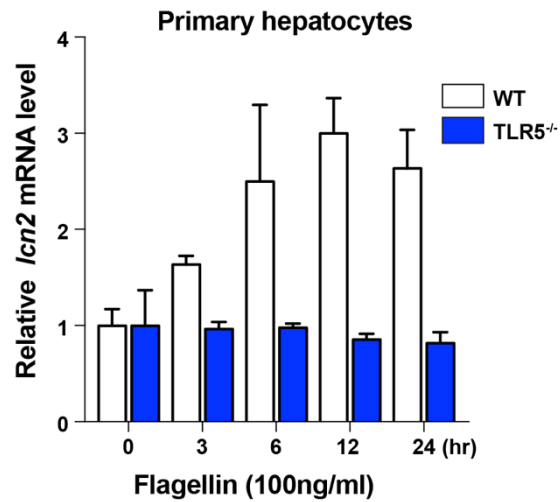

**Supplemental Figure 2. *Lcn2* expression in primary hepatocyte cultures of WT or TLR5<sup>-/-</sup> mice treated with flagellin.** Hepatocytes were isolated from WT or TLR5<sup>-/-</sup> mice ( $n = 5$ ) by collagenase perfusion (Noh et al. 2018). After allowing cells to adhere for 12 h, cultures were treated with flagellin (100 ng/ml). *Lcn2* expression was measured by qPCR at the indicated times after treatment.

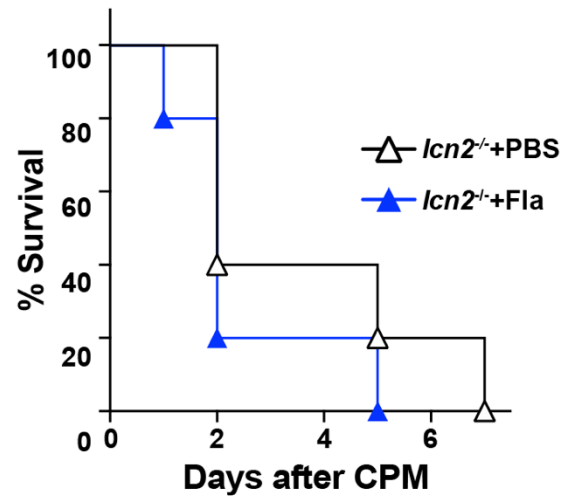

**Supplemental Figure 3.** Kaplan-Meier survival plot of *lcn2*<sup>-/-</sup> mice treated with flagellin or PBS 30 min prior to CPM treatment (n = 5 per group).

## References

Noh JR, Kim YH, Kim DK, et al. (2018) Small heterodimer partner negatively regulates C-X-C motif chemokine ligand 2 in hepatocytes during liver inflammation. *Sci Rep* 8: 15222)
